# Supplementary material
Source: Springer Nature journal article supplement (https://www.springermedizin.de/resource/supplementary/12939_2010_170_MOESM1_ESM.pdf/9551640)
Supplement: MOESM1 [file 9551640]

PubMed search terms:  
"cost-sharing", "copay", "copayments", "out of pocket", "direct payments", "incentive based", "patient charge", "prescription charge", "coinsurance", "deductible", "extra billing", "aged"

995 studies via PubMed

17 studies via reference lists

1012 studies

Contains no information on out-of-pocket payments by persons 65 years and older

217 studies

Contains no information on inequalities concerning out-of-pocket costs in relation to income, education and gender of persons 65 years and older

29 studies
